# Supplementary material
Source: PubMed Central journal article supplement (PMC4596916)
Supplement: mmc1.pdf [file mmc1.pdf]

The American Journal of Human Genetics

Supplemental Data

## **Modeling Linkage Disequilibrium**

### **Increases Accuracy of Polygenic Risk Scores**

**Bjarni J. Vilhjálmsson, Jian Yang, Hilary K. Finucane, Alexander Gusev, Sara Lindström, Stephan Ripke, Giulio Genovese, Po-Ru Loh, Gaurav Bhatia, Ron Do, Tristan Hayeck, Hong-Hee Won, Schizophrenia Working Group of the Psychiatric Genomics Consortium, Discovery, Biology, and Risk of Inherited Variants in Breast Cancer (DRIVE) study, Sekar Kathiresan, Michele Pato, Carlos Pato, Rulla Tamimi, Eli Stahl, Noah Zaitlen, Bogdan Pasaniuc, Gillian Belbin, Eimear E. Kenny, Mikkel H. Schierup, Philip De Jager, Nikolaos A. Patsopoulos, Steve McCarroll, Mark Daly, Shaun Purcell, Daniel Chasman, Benjamin Neale, Michael Goddard, Peter M. Visscher, Peter Kraft, Nick Patterson, and Alkes L. Price**

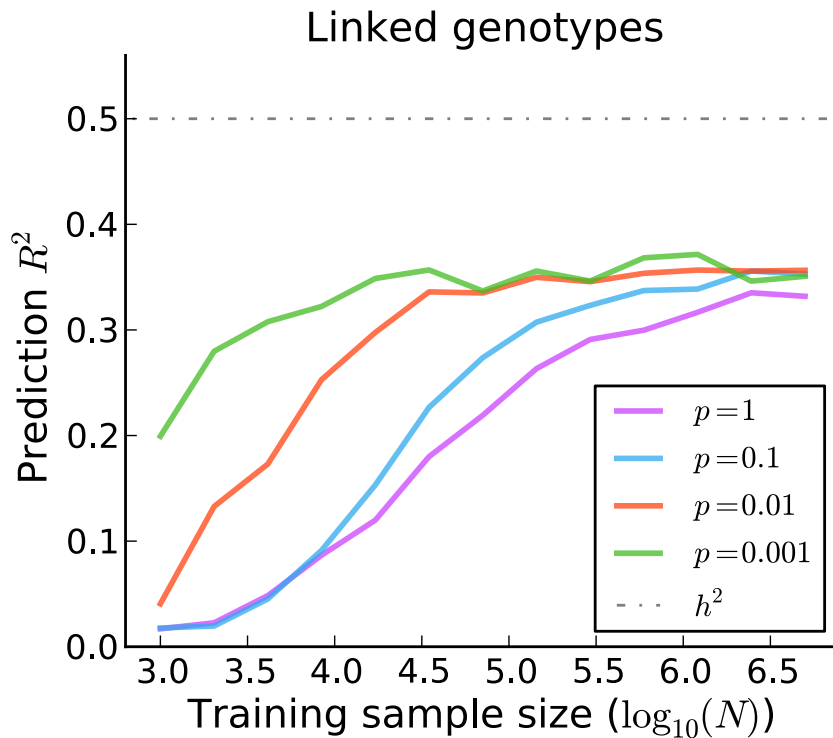

**Figure S1. Performance of P+T when causal markers cluster.** Performance of P+T (LD-pruning followed by thresholding) for an alternative genetic architecture where causal markers cluster. The results are averaged over 3000 simulated traits with 200K simulated genotypes where the average fraction of causal variants  $p$  was let vary. The simulated genotypes are linked, where we simulated independent batches of 100 markers where the squared correlation between adjacent variants in a batch was fixed to 0.9. For each simulated 100 SNP region of LD, we sampled the fraction of causal markers within a region from a  $\text{Beta}(p, 1-p)$  distribution, ensuring that the expected fraction of causal markers across the genome is still  $p$ . This will cause causal variants to cluster in some regions of the genome. As expected, the impact of LD on the prediction accuracy of P+T is greater when causal variants cluster, and still substantial for small values of  $p$ .

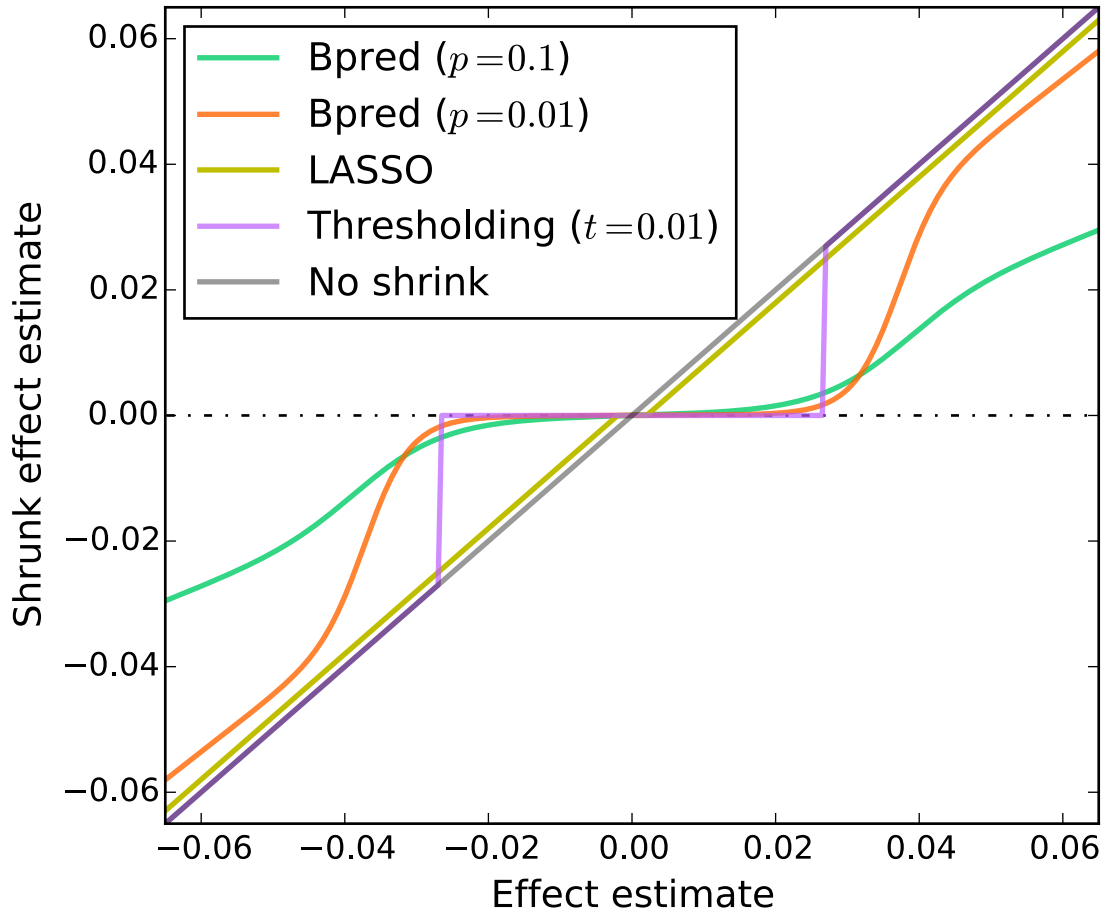

**Figure S2. Comparison of five different shrinks in the absence of LD.** Bpred corresponds to LDpred without LD and can be derived analytically (see Materials and Methods for details). The marginal (least square) effect estimate is plotted against the shrunken estimate for the five different shrinks. Bpred denotes the analytical solution to LDpred, which can be derived in the absence of LD (see Appendix A for details). The Bpred shrink shown here assumes that the heritability is 0.5 and the training sample size is 10,000 and the number of markers is 60,000. Similarly, the LASSO shrink shown here corresponds to the (marginal) posterior mode effect under a Laplace prior for the causal effects. Compared to *P*-value thresholding, and LASSO, Bpred can be viewed as a smoother shrink.

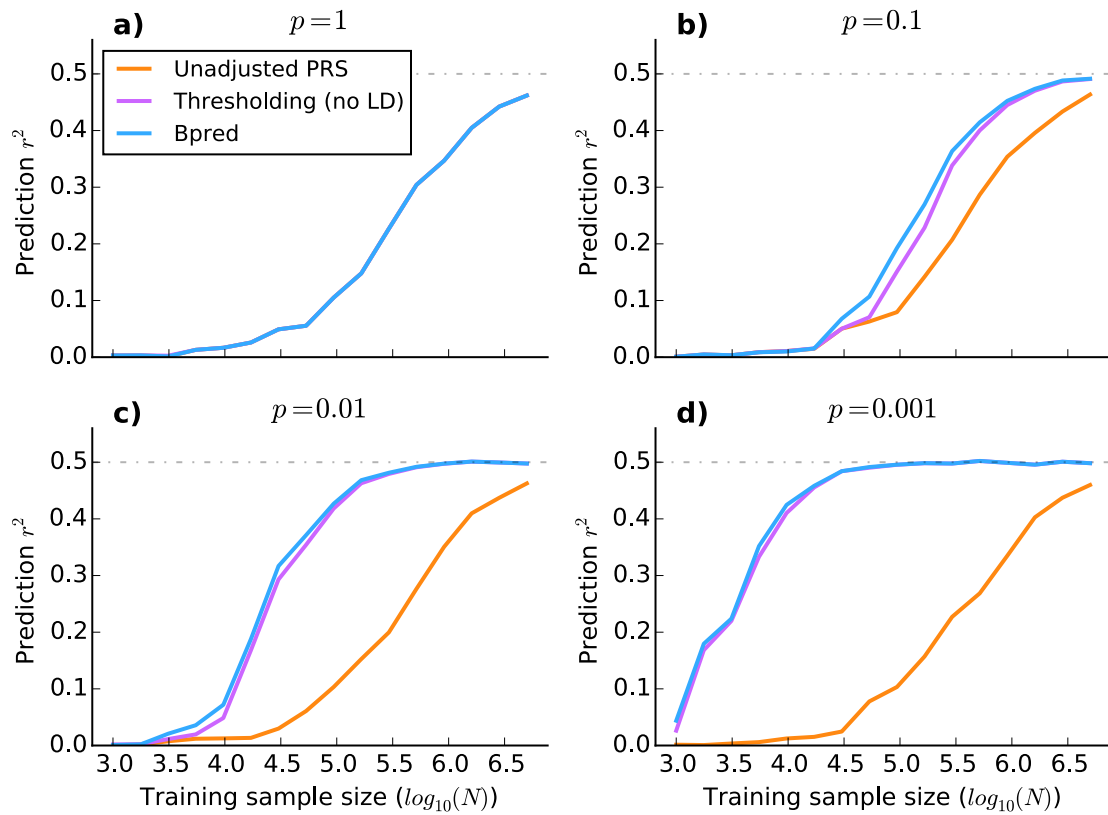

**Figure S3. Comparison of methods using simulated genotypes without LD.** The four subfigures **a-d** correspond to different genetic architectures where we vary  $p$ , the fraction of variants with (non-zero) effects drawn from a Gaussian distribution. Bpred denotes the analytical solution to LDpred, which can be derived in the absence of LD (see Appendix A for details). As expected, Bpred outperforms  $P$ -value thresholding in the absence of LD, although not by much.

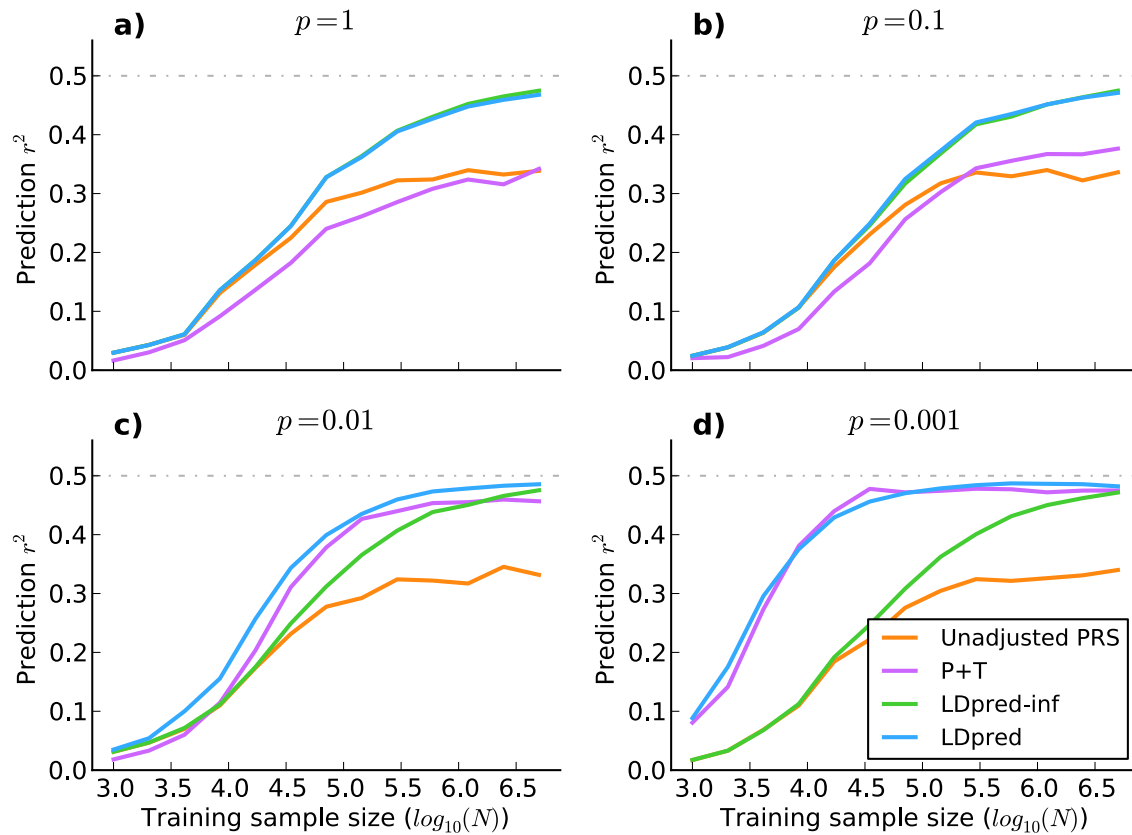

**Figure S4. Comparison of methods using simulated genotypes with LD.** The four subfigures **a-d** correspond to different genetic architectures where we vary  $p$ , the fraction of variants with (non-zero) effects drawn from a Gaussian distribution. We simulated marginal least square effect estimates with LD (see Materials and Methods for details). This enabled us to evaluate the behavior of the methods at large sample sizes. The LD structure consisted of 100 SNP regions where adjacent markers had  $r^2=0.9$ . For validation we simulated 200000 SNPs in 2000 individuals. For each point in the plot we averaged the results over 100 independent phenotype simulations keeping the simulated genotypes fixed (see Materials and Methods for details). Note that when  $p=0.001$ , the chance of two causal variants being in LD is very small ( $\sim 1\%$ ), and thus the improvement from accounting for LD in LDpred is negligible compared to P+T.

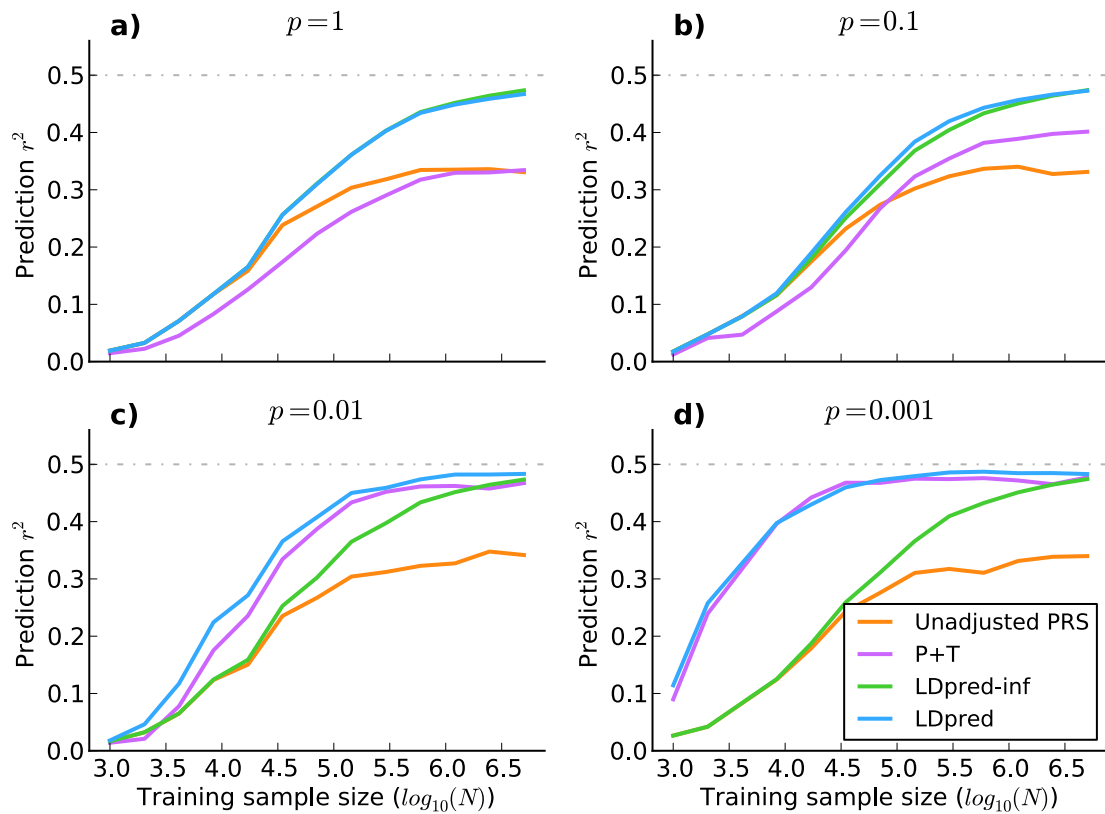

**Figure S5. Comparison of methods when effects follow a Laplace distribution.**

Here the genotypes were simulated with LD using same simulation setup as in **Figure S4**, except the effect estimates were drawn from a Laplace mixture distribution instead of Gaussian mixture distribution. The change in prior appears to have minimal effect on the shape of the curve and the relative performance.

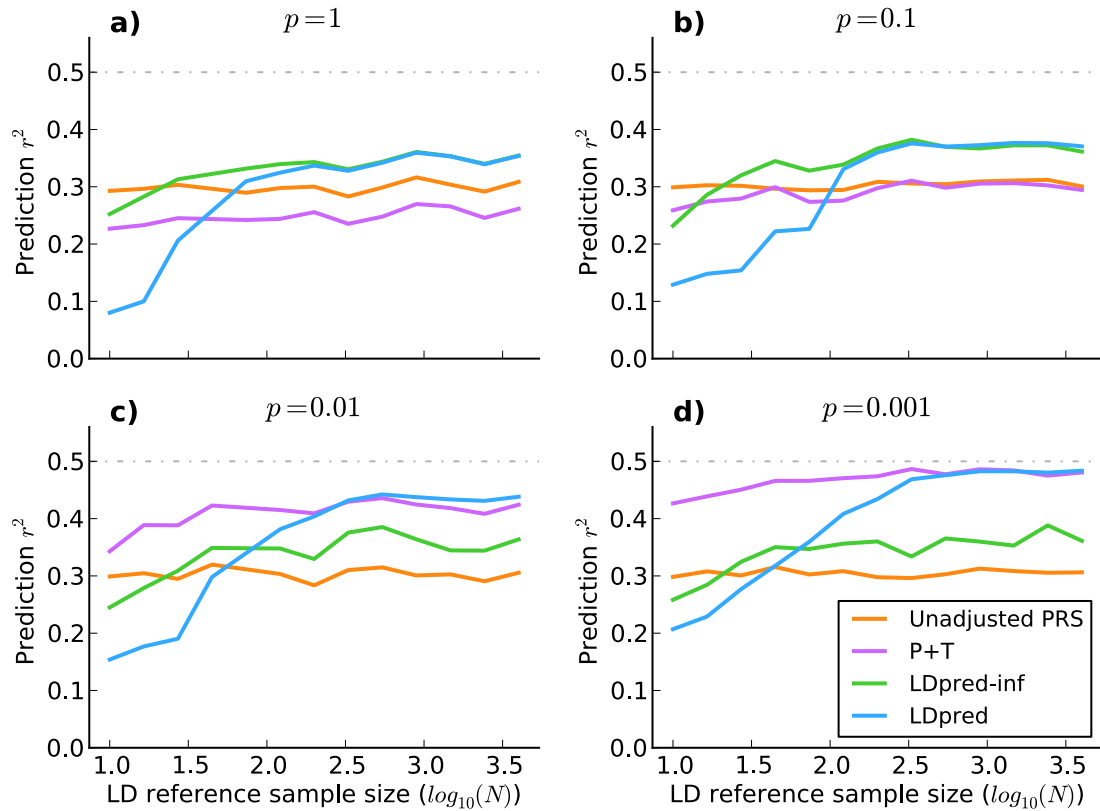

**Figure S6. Prediction accuracy for methods as a function of LD reference sample size.** Following the simulation setup from before (see **Figure S4.**) we simulated marginal least square effect estimates with LD (see Materials and Methods for details). We simulated segments of 100 SNPs where adjacent markers had  $r^2=0.9$ . We simulated in total 200000 SNPs and 2000 validation individuals. For each point in the plot we averaged the results over 100 independent phenotype simulations keeping the simulated validation genotypes fixed (see Materials and Methods for details). In addition, we simulated an LD reference panel with varying sample size along the x-axis. From these plots we see that a LD reference panel with more than 1000 individuals is necessary to ensure accurate LDpred scores. The accuracy of LDpred appears to be more sensitive to poor LD estimates than both P+T and LDpred-inf. Note that the Unadjusted PRS does not depend on LD information and is therefore expected to be a straight line, and thus providing a baseline.

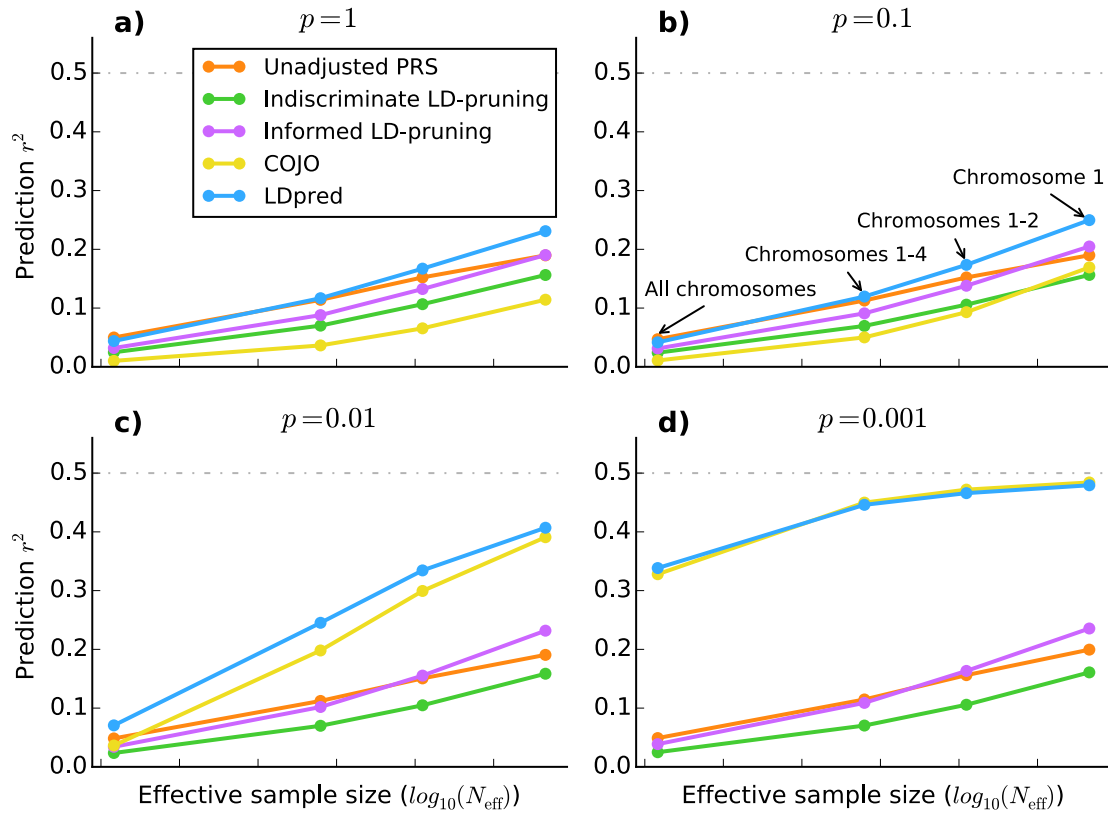

**Figure S7. Comparisons to other methods using simulated traits and real WTCCC genotypes.** As expected COJO<sup>1,2</sup> performs close to optimal with sufficient training data, or more precisely, when the ratio  $(Nh^2)/(Mp)$  is approximately larger than 10. The comparison between the two types of LD-pruning clearly demonstrates the advantage of informed LD-pruning over indiscriminate LD-pruning, which randomly prunes either marker of a pair of markers in LD. For both LD-pruning strategies a pair of markers was considered in LD if  $r^2 > 0.2$ . When LDpred is compared to conditional joint analysis (COJO), LDpred outperforms COJO as long as the data does not overwhelm the prior, i.e. when  $(Nh^2)/(Mp)$  is not sufficiently large ( $< 10$ ). For most of the diseases considered in this paper, current sample sizes are still not large enough for joint estimates to yield accurate risk scores.



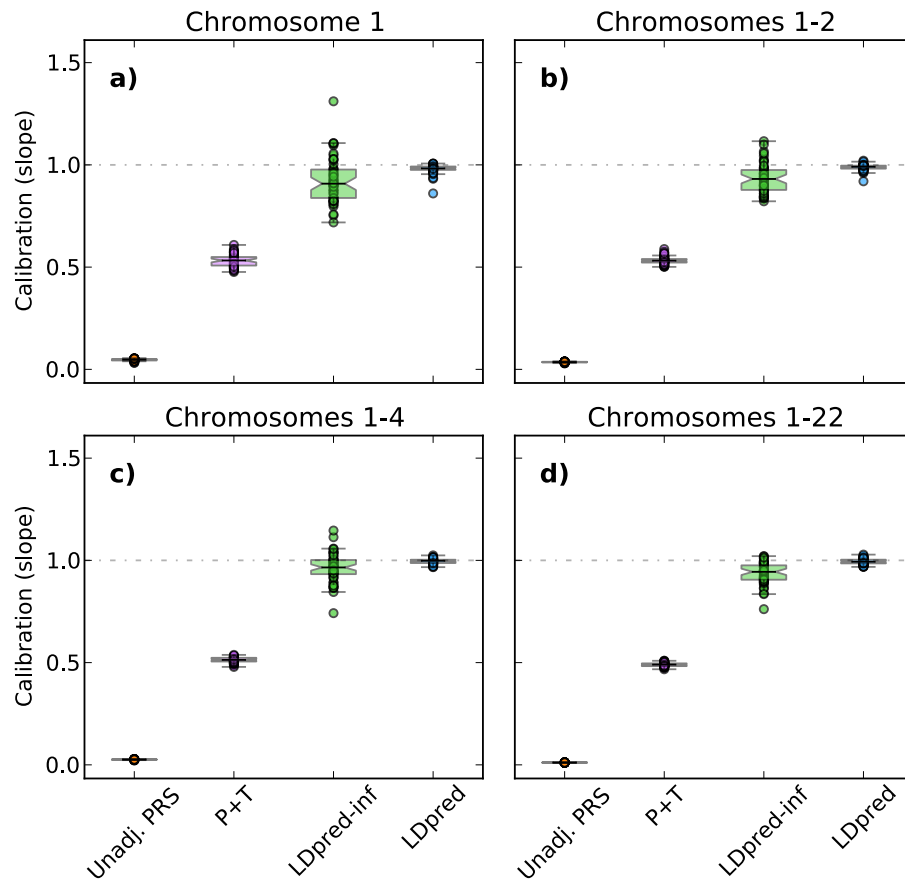

**Figure S8. Boxplots of calibration slopes for simulations in Figure 2.** Boxplots of calibration slopes for the four prediction methods evaluated in Figure 2 for  $p=0.001$  (the fraction of variants with non-zero effects). The subfigures **a-d** correspond to different number of SNPs used, ranging from 30,004 SNPs on chromosome 1 in **a**) to 376,901 SNPs or the full genome in **d**). If the prediction conditional on the true value is unbiased then we expect a slope of one. A slope of less than one implies that the predicted value is mis-calibrated by a factor of  $1/\text{slope}$ . Results for other values of  $p$  ( $p=1$ ;  $p=0.1$ ;  $p=0.01$ ) gave similar results, and even stronger bias for P+T (LD-pruning followed by  $P$ -value thresholding).

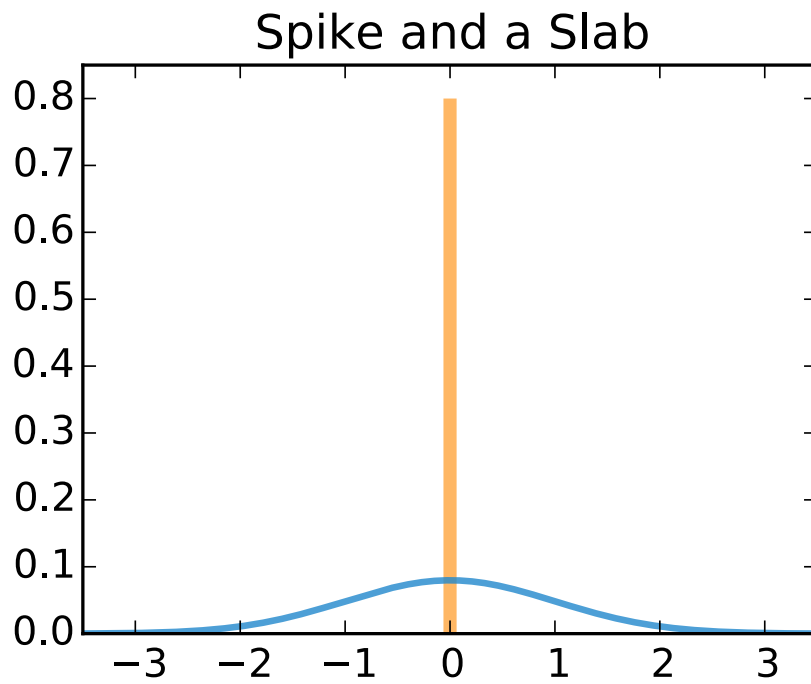

**Figure S9. A spike and slab prior.** An illustration of a spike and slab prior with a Gaussian slab.

| Prediction Method                                               | Accounts for LD? | Accounts for non-infinitesimal genetic architecture? | Comments                                                                   |
|-----------------------------------------------------------------|------------------|------------------------------------------------------|----------------------------------------------------------------------------|
| <b>Unadjusted polygenic risk score</b>                          | No.              | No.                                                  |                                                                            |
| <b>LD-pruning followed by <i>P</i>-value thresholding (P+T)</b> | Yes*.            | Yes.                                                 | A heuristic that discards information from pruned and thresholded markers. |
| <b>LDpred-inf</b>                                               | Yes.             | No.                                                  | An analytical solution that assumes an infinitesimal prior for effects.    |
| <b>LDpred</b>                                                   | Yes.             | Yes.                                                 | A Gibbs sampler that assumes a point-normal mixture prior for effects.     |

**Table S1. Overview of methods.** A list of the main polygenic risk score methods (using summary association statistics as input) considered in this study. (\*Although P+T prunes SNPs in high LD, it ignores bias induced by linked causal markers.)

| Disease    | Prediction accuracy measurement | Unadjusted PRS using all SNPs | Pruning + Thresholding | LDpred-inf | LDpred |
|------------|---------------------------------|-------------------------------|------------------------|------------|--------|
| <b>T1D</b> | Observed scale $R^2$            | 0.1064                        | 0.3195                 | 0.1062     | 0.3832 |
|            | Nagelkerke $R^2$                | 0.1442                        | 0.4228                 | 0.1438     | 0.5084 |
|            | Liability scale $R^2$           | 0.0426                        | 0.0934                 | 0.0426     | 0.1037 |
|            | AUC                             | 0.6915                        | 0.8410                 | 0.6912     | 0.8738 |
| <b>T2D</b> | Observed scale $R^2$            | 0.0360                        | 0.0465                 | 0.0404     | 0.0467 |
|            | Nagelkerke $R^2$                | 0.0488                        | 0.0631                 | 0.0547     | 0.0633 |
|            | Liability scale $R^2$           | 0.0257                        | 0.0327                 | 0.0287     | 0.0329 |
|            | AUC                             | 0.6094                        | 0.6243                 | 0.6180     | 0.6275 |
| <b>CAD</b> | Observed scale $R^2$            | 0.0250                        | 0.0349                 | 0.0290     | 0.0333 |
|            | Nagelkerke $R^2$                | 0.0338                        | 0.0473                 | 0.0393     | 0.0451 |
|            | Liability scale $R^2$           | 0.0191                        | 0.0263                 | 0.0221     | 0.0253 |
|            | AUC                             | 0.5880                        | 0.6087                 | 0.5963     | 0.6043 |
| <b>CD</b>  | Observed scale $R^2$            | 0.0428                        | 0.0485                 | 0.0461     | 0.0824 |
|            | Nagelkerke $R^2$                | 0.0585                        | 0.0661                 | 0.0630     | 0.1122 |
|            | Liability scale $R^2$           | 0.0148                        | 0.0167                 | 0.0159     | 0.0267 |
|            | AUC                             | 0.6212                        | 0.6313                 | 0.6279     | 0.6693 |
| <b>RA</b>  | Observed scale $R^2$            | 0.0483                        | 0.1151                 | 0.0462     | 0.1354 |
|            | Nagelkerke $R^2$                | 0.0656                        | 0.1540                 | 0.0627     | 0.1801 |
|            | Liability scale $R^2$           | 0.0239                        | 0.0508                 | 0.0229     | 0.0579 |
|            | AUC                             | 0.6277                        | 0.6994                 | 0.6267     | 0.7162 |
| <b>BD</b>  | Observed scale $R^2$            | 0.0707                        | 0.0876                 | 0.0798     | 0.0816 |
|            | Nagelkerke $R^2$                | 0.09578                       | 0.1185                 | 0.1080     | 0.1105 |
|            | Liability scale $R^2$           | 0.0308                        | 0.0371                 | 0.0342     | 0.0349 |
|            | AUC                             | 0.6552                        | 0.6744                 | 0.6662     | 0.6682 |
| <b>HT</b>  | Observed scale $R^2$            | 0.0306                        | 0.0424                 | 0.0348     | 0.0376 |
|            | Nagelkerke $R^2$                | 0.0414                        | 0.0574                 | 0.0471     | 0.0509 |
|            | Liability scale $R^2$           | 0.0258                        | 0.0351                 | 0.0292     | 0.0314 |
|            | AUC                             | 0.6005                        | 0.6180                 | 0.6072     | 0.6109 |

**Table S2. Numerical values of results displayed in Figure 3.** The values are displayed on four different  $R^2$  or AUC scales. To transform the prediction  $R^2$  to liability scale we used the Lee *et al.*  $R^2$  transformation<sup>3</sup> using values of disease prevalence specified in Supplementary Table 2.

| Disease    | Optimal fraction of causal markers used in LDpred | Optimal <i>P</i> -value threshold for Pruning + Thresholding | LDpred estimated heritability | LDpred estimated heritability on liability scale | Assumed disease prevalence |
|------------|---------------------------------------------------|--------------------------------------------------------------|-------------------------------|--------------------------------------------------|----------------------------|
| <b>T1D</b> | 0.001                                             | 10 <sup>-6</sup>                                             | 1.3250                        | 0.7258                                           | 0.005                      |
| <b>T2D</b> | 0.03                                              | 1                                                            | 0.6206                        | 0.5125                                           | 0.03                       |
| <b>CAD</b> | 0.03                                              | 1                                                            | 0.6160                        | 0.5181                                           | 0.035                      |
| <b>CD</b>  | 0.01                                              | 0.0001                                                       | 0.7974                        | 0.2904                                           | 0.001                      |
| <b>RA</b>  | 0.0001                                            | 10 <sup>-6</sup>                                             | 0.9097                        | 0.5145                                           | 0.0075                     |
| <b>BD</b>  | 0.1                                               | 1                                                            | 0.9695                        | 0.4959                                           | 0.005                      |
| <b>HT</b>  | 0.03                                              | 1                                                            | 0.6216                        | 0.5939                                           | 0.05                       |

**Table S3. P+T and LDpred parameters for methods evaluated in Figure 3.** The heritabilities are calculated as averages over 5 cross validations. The Lee *et al.* heritability transformation<sup>4</sup> was used to obtain the heritability on the liability scale. The LD window size used in the simulations was 400 SNPs.

| Disease    | Unadjusted PRS using all SNPs | Pruning + Thresholding | LDpred-inf | LDpred |
|------------|-------------------------------|------------------------|------------|--------|
| <b>T1D</b> | 0.0082                        | 0.4301                 | 3.2282     | 0.6365 |
| <b>T2D</b> | 0.0056                        | 0.0278                 | 1.2678     | 1.0198 |
| <b>CAD</b> | 0.0058                        | 0.0231                 | 2.1214     | 1.6566 |
| <b>CD</b>  | 0.0059                        | 0.0231                 | 1.4159     | 0.8570 |
| <b>RA</b>  | 0.0069                        | 0.3163                 | 2.3133     | 0.7755 |
| <b>BD</b>  | 0.0076                        | 0.0249                 | 1.2348     | 1.1472 |
| <b>HT</b>  | 0.0055                        | 0.0301                 | 1.7345     | 1.7039 |

**Table S4. Calibration comparison for methods evaluated in Figure 3.** We report the slope, where a value close to 1 represents a well-calibrated prediction. LDpred yields the most appropriately calibrated predictions.

| Disease        | Prediction accuracy measurement | Unadjusted PRS using all SNPs | Pruning + Thresholding | LDpred-inf | LDpred |
|----------------|---------------------------------|-------------------------------|------------------------|------------|--------|
| <b>SCZ-MGS</b> | Observed scale $R^2$            | 0.1591                        | 0.1510                 | 0.1870     | 0.1898 |
|                | Nagelkerke $R^2$                | 0.2119                        | 0.2014                 | 0.2488     | 0.2528 |
|                | Liability scale $R^2$           | 0.0616                        | 0.0594                 | 0.0688     | 0.0694 |
|                | AUC                             | 0.7294                        | 0.7248                 | 0.7499     | 0.7519 |
| <b>SCZ-ISC</b> | Observed scale $R^2$            | 0.1169                        | 0.0970                 | 0.1334     | 0.1367 |
|                | Nagelkerke $R^2$                | 0.1574                        | 0.1304                 | 0.1803     | 0.1836 |
|                | Liability scale $R^2$           | 0.0518                        | 0.0446                 | 0.0578     | 0.0585 |
|                | AUC                             | 0.6988                        | 0.6784                 | 0.7127     | 0.7165 |
| <b>MS</b>      | Observed scale $R^2$            | 0.0316                        | 0.0674                 | 0.0363     | 0.0840 |
|                | Nagelkerke $R^2$                | 0.0474                        | 0.0978                 | 0.0512     | 0.1198 |
|                | Liability scale $R^2$           | 0.0149                        | 0.0302                 | 0.0170     | 0.0368 |
|                | AUC                             | 0.6169                        | 0.6714                 | 0.6187     | 0.6918 |
| <b>BC</b>      | Observed scale $R^2$            | 0.0071                        | 0.0324                 | 0.0092     | 0.0386 |
|                | Nagelkerke $R^2$                | 0.0097                        | 0.0437                 | 0.0119     | 0.0519 |
|                | Liability scale $R^2$           | 0.0040                        | 0.0184                 | 0.0052     | 0.0220 |
|                | AUC                             | 0.5489                        | 0.6052                 | 0.5549     | 0.6156 |
| <b>T2D</b>     | Observed scale $R^2$            | 0.0159                        | 0.0247                 | 0.0214     | 0.0273 |
|                | Nagelkerke $R^2$                | 0.0212                        | 0.0330                 | 0.0309     | 0.0365 |
|                | Liability scale $R^2$           | 0.0112                        | 0.0170                 | 0.0149     | 0.0187 |
|                | AUC                             | 0.5747                        | 0.5854                 | 0.5825     | 0.5953 |
| <b>CAD</b>     | Observed scale $R^2$            | 0.0109                        | 0.0101                 | 0.0124     | 0.0125 |
|                | Nagelkerke $R^2$                | 0.0146                        | 0.0137                 | 0.0168     | 0.0170 |
|                | Liability scale $R^2$           | 0.0085                        | 0.0080                 | 0.0097     | 0.0098 |
|                | AUC                             | 0.5612                        | 0.5557                 | 0.5645     | 0.5647 |

**Table S5. Numerical values of results displayed in Figure 4.** The numerical results are shown on four different  $R^2$  or AUC scales.

| Trait  | Prediction accuracy measurement | Unadjusted PRS using all SNPs | Pruning + Thresholding | LDpred-inf | LDpred |
|--------|---------------------------------|-------------------------------|------------------------|------------|--------|
| Height | $R^2$                           | 0.0927                        | 0.0841                 | 0.0906     | 0.1014 |
|        | PC-adjusted $R^2$               | 0.0697                        | 0.0634                 | 0.0656     | 0.0853 |
|        | Risk Score + PC $R^2$           | 0.1205                        | 0.1146                 | 0.1166     | 0.1353 |

**Table S6. Prediction accuracy for height.** Height and the polygenic risk score for height is stratified by population structure. The prediction accuracy is therefore substantially reduced when we account for the first 5 principal components. Interestingly, LDpred improves the PC-adjusted prediction accuracy by 30% compared to P+T.



| Disease    | Prediction accuracy measurement | Unadjusted PRS using all SNPs | Pruning + Thresholding | LDpred-inf | LDpred |
|------------|---------------------------------|-------------------------------|------------------------|------------|--------|
| <b>T2D</b> | Observed scale $R^2$            | 0.0022                        | 0.0109                 | 0.0023     | 0.0095 |
|            | Nagelkerke $R^2$                | 0.0029                        | 0.0175                 | 0.0030     | 0.0126 |
|            | Liability scale $R^2$           | 0.0011                        | 0.0055                 | 0.0012     | 0.0048 |
|            | AUC                             | 0.5247                        | 0.5633                 | 0.5249     | 0.5573 |
| <b>CAD</b> | Observed scale $R^2$            | 0.0029                        | 0.0058                 | 0.0030     | 0.0048 |
|            | Nagelkerke $R^2$                | 0.0039                        | 0.0078                 | 0.0040     | 0.0065 |
|            | Liability scale $R^2$           | 0.0023                        | 0.0046                 | 0.0024     | 0.0038 |
|            | AUC                             | 0.5284                        | 0.5418                 | 0.5289     | 0.5374 |

**Table S7. Additional validation for T2D and CAD when training on WTCCC data.** Prediction accuracy for type-2 diabetes and coronary artery disease when training on WTCCC cases and controls and predicting into the WGHS data.

| Disease        | Optimal <i>P</i> -value threshold for Pruning + Thresholding | Optimal Gaussian mixture weight (fraction of causal markers) for LDpred | LDpred/ LD-pruning window size (# of SNPs) | GWAS sample size used in LDpred | LDpred estimated heritability | LDpred estimated heritability on liability scale | Assumed prevalence |
|----------------|--------------------------------------------------------------|-------------------------------------------------------------------------|--------------------------------------------|---------------------------------|-------------------------------|--------------------------------------------------|--------------------|
| <b>SCZ-MGS</b> | 0.1                                                          | 0.3                                                                     | 500                                        | 65K                             | 0.5738                        | 0.4231                                           | 0.01               |
| <b>SCZ-ISC</b> | 0.1                                                          | 0.3                                                                     | 500                                        | 65K                             | 0.4718                        | 0.3479                                           | 0.01               |
| <b>MS</b>      | 0.001                                                        | 0.01                                                                    | 400                                        | 27K                             | 0.3694                        | 0.1321                                           | 0.001              |
| <b>BC</b>      | 0.00003                                                      | 0.003                                                                   | 400                                        | 50K                             | 0.1934                        | 0.1124                                           | 0.01               |
| <b>T2D</b>     | 0.00003                                                      | 0.1                                                                     | 300                                        | 69K                             | 0.2061                        | 0.1582                                           | 0.0075             |
| <b>CAD</b>     | 0.1                                                          | 1                                                                       | 300                                        | 86K                             | 0.2943                        | 0.2494                                           | 0.035              |

**Table S8. Model parameters for results in Figure 4.** Parameters inferred or assumed by P+T and LDpred for results displayed in Figure 4. The Lee *et al.* heritability transformation<sup>52</sup> was used to obtain the heritability on the liability scale.

| Disease | Unadjusted PRS using all SNPs | Pruning + Thresholding | LDpred-inf | LDpred |
|---------|-------------------------------|------------------------|------------|--------|
| SCZ-MGS | 0.0063                        | 0.0467                 | 0.3845     | 0.3918 |
| SCZ-ISC | 0.0130                        | 0.0407                 | 0.4683     | 0.4413 |
| MS      | 0.0089                        | 0.0717                 | 0.9092     | 0.2011 |
| BC      | 0.0017                        | 0.1327                 | 1.2323     | 0.5650 |
| T2D     | 0.0032                        | 0.1002                 | 0.6421     | 0.4057 |
| CAD     | 0.0035                        | 0.0137                 | 0.2244     | 0.1868 |

**Table S9. Calibration slopes for methods evaluated in Figure 4.** We report the slope, where a value close to 1 represents a well-calibrated prediction.

| Schizophrenia Cohort                    | Prediction accuracy measurement | Unadjusted PRS using all SNPs | Pruning + Thresholding | LDpred-inf | LDpred |
|-----------------------------------------|---------------------------------|-------------------------------|------------------------|------------|--------|
| <b>MGS (European ancestry)</b>          | Observed scale $R^2$            | 0.1591                        | 0.1510                 | 0.1870     | 0.1898 |
|                                         | Nagelkerke $R^2$                | 0.2119                        | 0.2014                 | 0.2488     | 0.2528 |
|                                         | Liability scale $R^2$           | 0.0616                        | 0.0594                 | 0.0688     | 0.0694 |
|                                         | AUC                             | 0.7294                        | 0.7248                 | 0.7499     | 0.7519 |
| <b>JPN1 (Japanese ancestry)</b>         | Observed scale $R^2$            | 0.0477                        | 0.0702                 | 0.0691     | 0.0695 |
|                                         | Nagelkerke $R^2$                | 0.0635                        | 0.0944                 | 0.0923     | 0.0929 |
|                                         | Liability scale $R^2$           | 0.0232                        | 0.0323                 | 0.0319     | 0.0320 |
|                                         | AUC                             | 0.6276                        | 0.6527                 | 0.6523     | 0.6531 |
| <b>TCR1 (Chinese ancestry)</b>          | Observed scale $R^2$            | 0.0570                        | 0.0616                 | 0.0704     | 0.0717 |
|                                         | Nagelkerke $R^2$                | 0.0761                        | 0.0821                 | 0.0939     | 0.0956 |
|                                         | Liability scale $R^2$           | 0.0274                        | 0.0294                 | 0.0329     | 0.0336 |
|                                         | AUC                             | 0.6331                        | 0.6391                 | 0.6483     | 0.6488 |
| <b>HOK2 (Chinese ancestry)</b>          | Observed scale $R^2$            | 0.0253                        | 0.0306                 | 0.0374     | 0.0373 |
|                                         | Nagelkerke $R^2$                | 0.0414                        | 0.0511                 | 0.0609     | 0.0609 |
|                                         | Liability scale $R^2$           | 0.0187                        | 0.0225                 | 0.0271     | 0.0271 |
|                                         | AUC                             | 0.6176                        | 0.6250                 | 0.6352     | 0.6352 |
| <b>AFAM (African American ancestry)</b> | Observed scale $R^2$            | 0.0170                        | 0.0151                 | 0.0279     | 0.0280 |
|                                         | Nagelkerke $R^2$                | 0.0233                        | 0.0202                 | 0.0382     | 0.0383 |
|                                         | Liability scale $R^2$           | 0.0095                        | 0.0084                 | 0.0152     | 0.0152 |
|                                         | AUC                             | 0.5745                        | 0.5682                 | 0.5936     | 0.5936 |

**Table S10. Prediction accuracy for schizophrenia risk scores when validating in non-European populations.** The accuracy is reported on four different  $R^2$  or AUC scales.

| SCZ cohort | Genetic ancestry    | Optimal <i>P</i> -value threshold for Pruning + Thresholding | Optimal Gaussian mixture weight (fraction of causal markers) for LDpred | LDpred/ LD-pruning window size (# of SNPs) | GWAS sample size used in LDpred |
|------------|---------------------|--------------------------------------------------------------|-------------------------------------------------------------------------|--------------------------------------------|---------------------------------|
| JPN1       | Japanese (Tokai)    | 0.1                                                          | 0.3                                                                     | 1000                                       | 65000                           |
| TCR1       | Chinese (Singapore) | 0.1                                                          | 0.3                                                                     | 1000                                       | 65000                           |
| HOK2       | Chinese (Hong Kong) | 1                                                            | 1                                                                       | 1000                                       | 65000                           |
| AFAM       | African American    | 0.3                                                          | 1                                                                       | 400                                        | 69000                           |

**Table S11.** Parameters inferred or assumed by P+T and LDpred for analysis of the non-European validation samples in **Table S10**.

## References

1. Rietveld, C.A. *et al.* GWAS of 126,559 Individuals Identifies Genetic Variants Associated with Educational Attainment. *Science* **340**, 1467-1471 (2013).
2. Yang, J. *et al.* Conditional and joint multiple-SNP analysis of GWAS summary statistics identifies additional variants influencing complex traits. *Nature Genetics* **44**, 369-375 (2012).
3. Lee, S.H., Goddard, M.E., Wray, N.R. & Visscher, P.M. A Better Coefficient of Determination for Genetic Profile Analysis. *Genetic Epidemiology* **36**, 214-224 (2012).
4. Lee, S., Wray, N., Goddard, M. & Visscher, P. Estimating missing heritability for disease from genome-wide association studies. *American Journal Of Human Genetics* **88**, 294-305 (2011).
